# Supplementary material for: Digging in or building bridges? A scoping review of thematic analysis
Source: Frontiers journal article supplement (doi:10.3389/frma.2025.1617380), 2025-11-20
Supplement: Table_1.docx [file Table_1.docx]

**Supplementary Material A.** Journals included in the data set

| **Rank** | **Journal name** | **Number of articles** | **Article citations** | | | | **Average article age**(1) | **Article citations per year since publication** | | |
| --- | --- | --- | --- | --- | --- | --- | --- | --- | --- | --- |
| Journal total | Mean per article | Min | Max | Mean per article | Min | Max |
| 1 | Health Communication | 55 | 629 | 11.44 | 0 | 40 | 5.45 | 2.35 | 0.00 | 6.00 |
| 2 | Journal of Social and Personal Relationships | 27 | 500 | 18.52 | 0 | 91 | 7.85 | 2.21 | 0.00 | 15.17 |
| 3 | New Media and Society | 23 | 650 | 28.26 | 0 | 199 | 5.26 | 4.99 | 0.00 | 39.80 |
| 4 | Information, Communication & Society | 18 | 176 | 9.78 | 1 | 54 | 4.61 | 2.10 | 0.27 | 10.80 |
| 5 | Public Relations Review | 13 | 408 | 31.38 | 2 | 133 | 6.85 | 5.01 | 0.67 | 26.60 |
| 6 | Journal of Applied Communication Research | 13 | 255 | 19.62 | 0 | 47 | 13.69 | 1.34 | 0.00 | 2.20 |
| 7 | Cyberpsychology, Behavior, and Social Networking(2) | 12 | 509 | 42.42 | 2 | 319 | 6.75 | 3.61 | 0.50 | 16.79 |
| 8 | Public Understanding of Science | 11 | 483 | 43.91 | 2 | 121 | 8.00 | 4.93 | 0.50 | 12.86 |
| 9 | Journalism Practice | 11 | 127 | 11.55 | 0 | 44 | 3.55 | 2.91 | 0.00 | 11.00 |
| 10 | International Journal of Communication | 11 | 122 | 11.09 | 4 | 47 | 5.36 | 2.25 | 0.60 | 9.40 |
| 11 | Communication Education | 10 | 227 | 22.70 | 4 | 70 | 11.60 | 1.93 | 0.80 | 4.38 |
| 12 | Technology, Pedagogy and Education | 10 | 120 | 12.00 | 0 | 51 | 5.70 | 1.68 | 0.00 | 5.10 |
| 13 | Journalism | 10 | 66 | 6.60 | 1 | 15 | 4.10 | 2.16 | 0.14 | 6.00 |
| 14 | Social Media + Society | 9 | 162 | 18.00 | 4 | 52 | 5.78 | 2.81 | 0.80 | 7.43 |
| 15 | Media, Culture & Society | 9 | 118 | 13.11 | 2 | 38 | 5.78 | 3.30 | 0.50 | 12.67 |
| 16 | Telematics and Informatics | 7 | 129 | 18.43 | 2 | 46 | 7.71 | 2.60 | 0.33 | 6.67 |
| 17 | Journal of Communication Management | 7 | 58 | 8.29 | 1 | 20 | 7.71 | 1.38 | 0.25 | 5.00 |
| 18 | Management Communication Quarterly | 6 | 176 | 29.33 | 5 | 102 | 12.33 | 1.97 | 0.59 | 4.64 |
| 19 | Journal of Professional Capital and Community | 6 | 82 | 13.67 | 1 | 74 | 4.33 | 2.01 | 0.25 | 9.25 |
| 20 | Journal of Health Communication | 6 | 52 | 8.67 | 2 | 18 | 7.83 | 1.15 | 0.33 | 2.57 |
| 21 | Journal of Family Communication | 6 | 40 | 6.67 | 2 | 15 | 4.67 | 1.65 | 0.29 | 5.00 |
| 22 | Convergence | 6 | 32 | 5.33 | 3 | 11 | 3.17 | 1.74 | 0.75 | 3.67 |
| 23 | Mass Communication and Society | 4 | 133 | 33.25 | 2 | 66 | 8.50 | 3.73 | 0.29 | 8.25 |
| 24 | Internet Research | 4 | 116 | 29.00 | 3 | 54 | 4.75 | 6.85 | 1.50 | 18.00 |
| 25 | Poetics | 4 | 96 | 24.00 | 0 | 69 | 10.00 | 1.67 | 0.00 | 3.13 |
| 26 | Journalism Studies | 4 | 48 | 12.00 | 3 | 27 | 3.50 | 3.10 | 1.00 | 5.40 |
| 27 | Crime, Media, Culture | 4 | 23 | 5.75 | 0 | 19 | 5.25 | 0.74 | 0.00 | 1.46 |
| 28 | Mobile Media & Communication | 4 | 23 | 5.75 | 1 | 13 | 3.75 | 1.36 | 0.50 | 2.60 |
| 29 | Applied Linguistics | 3 | 665 | 221.67 | 75 | 459 | 14.67 | 14.14 | 5.36 | 27.00 |
| 30 | Comunicar | 3 | 33 | 11.00 | 6 | 18 | 7.33 | 2.06 | 0.82 | 4.50 |
| 31 | Chinese Journal of Communication | 3 | 21 | 7.00 | 2 | 10 | 7.67 | 0.97 | 0.25 | 1.67 |
| 32 | Learned Publishing | 3 | 12 | 4.00 | 0 | 6 | 3.33 | 1.33 | 0.00 | 2.00 |
| 33 | Journal of Communication | 2 | 101 | 50.50 | 11 | 90 | 23.50 | 2.11 | 0.48 | 3.75 |
| 34 | Big Data & Society | 2 | 43 | 21.50 | 1 | 42 | 6.50 | 2.46 | 0.25 | 4.67 |
| 35 | Communication Monographs | 2 | 14 | 7.00 | 5 | 9 | 4.00 | 2.00 | 1.50 | 2.50 |
| 36 | International Journal of Press/Politics | 2 | 14 | 7.00 | 2 | 12 | 1.50 | 4.00 | 2.00 | 6.00 |
| 37 | Learning Environments Research | 2 | 11 | 5.50 | 3 | 8 | 4.50 | 1.32 | 1.14 | 1.50 |
| 38 | International Communication Gazette | 2 | 2 | 1.00 | 0 | 2 | 5.50 | 0.13 | 0.00 | 0.25 |
| 39 | Group Processes & Intergroup Relations | 1 | 201 | 201.00 | 201 | 201 | 25.00 | 8.04 | 8.04 | 8.04 |
| 40 | International Journal of Advertising | 1 | 72 | 72.00 | 72 | 72 | 17.00 | 4.24 | 4.24 | 4.24 |
| 41 | European Journal of Communication | 1 | 50 | 50.00 | 50 | 50 | 24.00 | 2.08 | 2.08 | 2.08 |
| 42 | Communication Theory | 1 | 33 | 33.00 | 33 | 33 | 5.00 | 6.60 | 6.60 | 6.60 |
| 43 | Journalism & Mass Communication Quarterly | 1 | 32 | 32.00 | 32 | 32 | 17.00 | 1.88 | 1.88 | 1.88 |
| 44 | Journal of Media Psychology | 1 | 17 | 17.00 | 17 | 17 | 15.00 | 1.13 | 1.13 | 1.13 |
| 45 | Communication Research | 1 | 4 | 4.00 | 4 | 4 | 3.00 | 1.33 | 1.33 | 1.33 |
| 46 | Digital Journalism | 1 | 3 | 3.00 | 3 | 3 | 3.00 | 1.00 | 1.00 | 1.00 |
| **Totals** | | 342 | 6,888 |  | | | | | | |
| **Means**(3) | | 7.28 | 146.55 | 26.52 |  | | 7.90 | 2.77 |  | |

1. 2024 minus publication year.
2. Including Cyberpsychology and Behavior(1998–2009).
3. The following 19 journals out of the 65 top-ranked Communication journals featured no relevant articles: Communication Methods and Measures, Political Communication, Journal of Advertising, Human Communication Research, Public Opinion Quarterly, Annals of the International Communication Association, Research on Language and Social Interaction, Media Psychology, Review of Communication Research, Vehicular Communications, Journalism & Communication Monographs, International Journal of Strategic Communication, Journal of Broadcasting & Electronic Media, Digital Communications and Networks, Journal of English as a Lingua Franca, Discourse Processes, Journal of Media Practice, Journal of Interactive Advertising, Symbolic Interaction.
