# Supplementary material for: Digging in or building bridges? A scoping review of thematic analysis
Source: Frontiers journal article supplement (doi:10.3389/frma.2025.1617380), 2025-11-20
Supplement: Table_2.docx [file Table_2.docx]

**Supplementary Material B.** Classification of TA articles according to the topical areas, based on ICA divisions and interest groups (1)

| **Count** | **Rank** (2) | **ICA divisions** (well-established topical areas with "ongoing scholarly interest") | **No. of articles** |
| --- | --- | --- | --- |
| 1 | 1 | Health Communication | 99 |
| 2 | 2 | Communication and Technology | 93 |
| 3 | 3 | Children, Adolescents, and the Media | 41 |
| 4 | 4 | Interpersonal Communication | 39 |
| 5 | 5 | Journalism Studies | 38 |
| 6 | 6 | Feminist Scholarship | 34 |
| 7 | 7 | Mass Communication | 26 |
| 8 | 9 | Communication Law and Policy | 18 |
| 9 |  | Organizational Communication | 18 |
| 10 |  | Political Communication | 18 |
| 11 | 10 | Ethnicity and Race in Communication | 17 |
| 12 | 11 | Intercultural Communication | 11 |
| 13 | 12 | Instructional & Developmental Communication | 10 |
| 14 | 13 | Public Relations | 8 |
| 15 | 14 | Environmental Communication | 6 |
| 16 |  | Game Studies | 6 |
| 17 | 15 | Language and Social Interaction | 4 |
| 18 |  | Popular Media & Culture | 4 |
| 19 | 16 | Global Communication and Social Change | 3 |
| 20 | 17 | Computational Methods | 2 |
| 21 |  | Philosophy, Theory and Critique | 2 |
| 22 | 18 | Mobile Communication | 1 |
| 23 | 19 | Communication History Division | 0 |
| 24 |  | Information Systems | 0 |
| 25 |  | Visual Communication Studies | 0 |
| **Count** | **Rank** | **Interest Groups** (ICA topical areas with "emerging scholarly interest") | **No. of articles** |
| 1 | 1 | Activism, Communication, and Social Justice | 11 |
| 2 | 2 | Lesbian, Gay, Bisexual, Transgender & Queer Studies | 8 |
| 3 | 3 | Communication Science and Biology | 2 |
| 4 | 3 | Intergroup Communication | 2 |
| 5 | 3 | Public Diplomacy | 2 |
| 6 | 4 | Human-Machine Communication | 1 |
| 7 | 4 | Sport Communication | 1 |
| 8 | 5 | Media Industry Studies | 0 |
| **Aggregate** (all 342 articles were classified into up to three categories) | | | **525** |

(1) With more than 5,000 members in over 80 countries the International Communication Association (ICA) is the largest communication association worldwide. ICA divisions and interest groups are concerned with different aspects of media and communication scholarship and have published short ‘mission statements’ on the ICA website. Using these mission statements as a basis to determine the topical areas which are addressed in the 342 articles under study, we allocated each article to the division(s) or interest group(s) which most closely relate to the contents of the respective article. Articles were classified as relating to either one, two or three divisions or interest groups.

(2) Ranked by number of articles.
