# Supplementary material for: Digging in or building bridges? A scoping review of thematic analysis
Source: Frontiers journal article supplement (doi:10.3389/frma.2025.1617380), 2025-11-20
Supplement: Table_3.docx [file Table_3.docx]

**Supplementary Material C**. Most cited articles from the data set: Data analysis methods

| **Article** (1) | **Topic** | **Citations** | | **Data analysis methods** | | |
| --- | --- | --- | --- | --- | --- | --- |
| **Total** | **Per year** | **TC applied** | **Prominent source(s)** | **Other methods** |
| Pavlenko (2007) | TA compared to alternative methods for analyzing autobiographic writing in authors’ second language | 459 | 27.00 | no | / | / |
| Coulson (2005) | Online support groups discussing shared health concerns | 319 | 16.79 | yes | Boyatzis (1998) | / |
| Drury & Reicher (1999) | Anti-poll tax demonstrations | 201 | 8.04 | yes | Kellehear (1993) | Consensual account construction (Denzin, 1989) |
| Cotter (2019) | Online communications among ‘Instagram influencers’ on how ‘rules encoded in [recommendation] algorithms’ affect visibility | 199 | 39.80 | yes | / | / |
| Xiong et al. (2019) | ‘Message frames’ of social movement organizations; the case of #MeToo movement | 133 | 26.60 | yes | Braun & Clarke (2006) | Semantic network analysis and ‘correlation tests’ (statistics) |
| Talmy (2011) | Conceptualizations of ‘interviews as research instruments’ versus ‘interviews as social practice’; data are drawn from an ethnography of a Hawai’i high school | 131 | 10.08 | yes | e.g.: Pavlenko (2007); Boyatzis (1998); Braun & Clarke (2006) | / |
| Smith & Joffe (2013) | Attitudes to global warming | 121 | 11.00 | yes | Joffe (2011) | / |
| Jaspal & Nerlich (2014) | UK press coverage of ‘socio-political dimensions of fracking’ | 111 | 11.10 | yes | / | / |
| Ruckenstein & Pantzar (2017) | Quantified Self | 107 | 15.29 | yes | / | / |
| Kassing (2002) | ‘[U]pward dissent within (…) organizations’ | 102 | 4.64 | yes | Glaser & Strauss (1967) | / |
| Antony & Thomas (2010) | Online communications regarding a police shooting in the USA | 100 | 7.14 | yes | Orbe & Kinefuchi (2008) | / |
| Hinchliff & Gott (2004) | Sexual health; ‘sexual activity in the context of long-term marriage’ | 91 | 4.55 | yes | Ritchie & Spencer (1994) | / |
| LeFebvre (2018) | Relationship initiation on Tinder | 91 | 15.17 | yes | E.g.: Bulmer (1979); Corbin & Strauss (1990) | Descriptive statistics |
| Harwood & Lin (2000) | Grandparents' relationships with their grandchildren | 90 | 3.75 | yes | / | / |
| Veltri & Atanasova (2017) | Attitudes regarding climate change | 90 | 12.86 | no(2) | / | / |
| Coulson & Knibb (2007) | Participation in an online support group regarding food allergies | 86 | 5.06 | yes | Boyatzis (1998) | / |
| Barkhuizen (2010) | ‘The imagined “better life” of a migrant pre-service teacher’ | 75 | 5.36 | yes | Pavlenko (2007) | / |
| Rincón-Gallardo & Fullan (2016) | Education networks | 74 | 9.25 | yes | Boyatzis (1998) | / |
| Roberts & Pettigrew (2007) | Childhood obesity and advertising | 72 | 4.24 | yes | / | Content analysis |
| Morreale & Pearson (2008) | ‘Communication instruction’ and ‘students’ future personal and professional success’ | 70 | 4.38 | yes | / | / |
| Tandon et al. (2021) | Fear of missing out among social media users | 54 | 18.00 | no | / | Content analysis of prior studies that adopted TC |
| Peña Gangadharan & Niklas (2019) | ‘Norms, values, and practices among European civil society organizations’ regarding ‘data and discrimination’ | 54 | 10.80 | yes(3) | Boyatzis (2001) | / |
| Suzor et al. (2019) | Transparency in content moderation on online platforms | 47 | 9.40 | yes | / | Content analysis |
| Jamil (2020) | ‘Pakistani female journalists’ lived experiences of sexual harassment, threats and discrimination’ | 44 | 11.00 | yes | / | / |
| Ytre-Arne & Moe (2021) | ‘Perceptions of algorithms on the media’ | 38 | 12.67 | yes | DeVito et al. (2017) | / |
| Gaudette et al. (2021) | Extreme right activists on Reddit | 36 | 12.00 | yes | Braun & Clarke (2006) | / |
| Jones et al. (2020) | ‘Ideology and rhetoric of [… a] Manosphere group’ and how it ‘propagates and normalises misogynistic beliefs’ | 34 | 8.50 | yes | / | Content analysis |
| Lupinacci (2021) | Experiences with social media regarding ‘continuous connectedness’ | 25 | 8.33 | yes | Attride-Stirling (2001); Guest et al. (2012) | / |
| Timmermans et al. (2021) | ‘Mobile daters’ […] experiences with ghosting’ | 25 | 8.33 | yes | Braun & Clarke (2006) | Content analysis and inferential statistics |

(1) The table covers all top-20 most cited papers and all top-20 papers by citations per year

(2) Automatic thematic analysis (text mining), combined with semantic network analysis, and ‘text classification according to psychological process categories’

(3) ‘[N]etworked thematic analysis’ with an ‘iterative strategy’
