# Supplementary material for: Digging in or building bridges? A scoping review of thematic analysis
Source: Frontiers journal article supplement (doi:10.3389/frma.2025.1617380), 2025-11-20
Supplement: Table_4.docx [file Table_4.docx]

**Supplementary Material D.** Most cited articles from the data set: Theory and data collection

| **Article**(1) | **Theory** | | **Data** | |
| --- | --- | --- | --- | --- |
| **Use of theory** | **Specifics (examples)** | **Collection methods** | **Count of units of analysis** |
| Pavlenko (2007) | n.a.  (paper is on data analysis methods) | / | n.a. | n.a.  *(not a systematic literature review)* |
| Coulson (2005) | ‘[D]eductive (i.e., theory-driven) thematic analysis’ | Categories of social support (Cutrona & Suhr 1992) | Web scraping | ‘572 messages posted to a computer-mediated bulletin board for individuals affected by irritable bowel syndrome’ |
| Drury & Reicher (1999) | Deductive | Social identity model of crowds (e.g. Reicher 1982) | Interviews | Interviews with 29 individuals, partially in groups, ‘video footage’, and ‘newspaper accounts’ |
| Cotter (2019) | Mostly inductive (2) | / | Web scraping | Not specified |
| Xiong et al. (2019) | Deductive | Co-creation (e.g. De Moya & Bravo 2016), feminism (e.g. Aldoory 2005), and framing (Hon 2016) | Web scraping | 21 Twitter accounts, featuring 408 relevant tweets |
| Talmy (2011) | Focus is directed on the conceptualization of the interview as research instrument | / | Interviews | Three groups of ESL students (in total 30 interviews) |
| Smith & Joffe (2013) | ‘[I]nductive’ and ‘deductive’ coding | Social representations theory (Markova 2003) | Interviews | ‘Purposive sample’ of 56 interviewees, with the help of a ‘London-based recruitment agency’ |
| Jaspal & Nerlich (2014) | Deductive | Social representations theory (Moscivici 1963) | Document analysis | 341 articles from 4 British broadsheet newspapers |
| Ruckenstein & Pantzar (2017) | Deductive | Kuhn’s (1962) paradigms | Document analysis | 41 *Wired* articles |
| Kassing (2002) | Deductive, even though the author refers to a ‘grounded theory methodology’ | Exit-voice-loyalty model of employee dissatisfaction (Hirschman 1970) | Survey | 135 employees of an undisclosed number of organizations in Arizona |
| Antony & Thomas (2010) | Deductive | [G]uard dog versus ‘watchdog’ conceptualizations of the role of mainstream media (e.g. Donohue et al. 1995) | Web scraping | 4 cellphone videos; 82 comments on YouTube |
| Hinchliff & Gott (2004) | Inductive | Reporting of prior empirical results and drawing on a framework provided by the National Centre for Social Research, UK | Interviews | ‘28 participants, who have been married for a minimum of 20 years’ from Sheffield, UK |
| LeFebvre (2018) | Self-declared ‘exploratory’ but with some deductive use of theory | Relationship development model (Knapp & Vangelisti, 2010) | Survey | 395 participants |
| Harwood & Lin (2000) | Inductive (reporting of prior empirical results) | / | Survey | 131 grandparents of young adults enrolled at a U.S. university |
| Veltri & Atanasova (2017) | Deductive | ‘[P]ersonal public’ (Schmidt 2014); ‘social representation theory’ (Moscivici 2000) | Web scraping | Over 61,122 tweets of a ‘random week sample’ |
| Coulson & Knibb (2007) | Inductive; explictly explorative | / | Interviews (online, structured) | 32 members of the Food Allergy Survivors Together online support group |
| Barkhuizen (2010) | Focus is directed on positioning analysis (of narrative data) | / | Reflective narratives, narrative interviews, conversations | A single migrant (from Tonga to New Zealand), aspiring to become an English teacher |
| Rincón-Gallardo & Fullan (2016) | Mostly inductive; described as an ‘iterative process of thematic analysis’ | ‘[S]ocial physics’ and ‘reality mining’ (Pentland 2014); | Literature review | 6 generic ‘literature reviews/studies’ and academic reports on 12 ‘network case studies’ regarding education |
| Roberts & Pettigrew (2007) | Inductive | / | Broadcasting media analysis | 212 food advertisements ‘screened in Perth, Australia, during children's morning television programming’ |
| Morreale & Pearson (2008) | Limited deduction; referring to extant ‘themes’ in the literature | / | Academic and non-academic literature review | 93 ‘journal and newspaper articles, reports and surveys’ |
| Tandon et al. (2021) | Some deduction by comparing and recombining extant themes | / | Systematic literature review | 58 empirical studies obtained from four academic databases |
| Peña Gangadharan & Niklas (2019) | Limited deduction | Abnormal justice (Fraser 2010) | Interviews | 30 interviews with civil society representatives |
| Suzor et al. (2019) | Inductive | The ‘Santa Clara Principles’ (2018) provide an initial structure | Survey | 380 respondents, ‘who have been the subject to content moderation practices of digital platforms’ |
| Jamil (2020) | Deductive | Postcolonial feminist theory (Mohanty 2003) and intersectionality | ‘In-depth interviews’ and focus groups; detailed discussion of inter-coder reliability | 41 female journalists; purposive sampling |
| Ytre-Arne & Moe (2021) | Limited deduction; ‘[p]redominantly inductive’ | ‘[F]olk theories’ (Eslami et al. 2016), ‘algorithmic imaginaries’ (Bucher 2017) | Survey (data comes from a survey regarding media literacy) | 1,363 Norwegians; representative sample |
| Gaudette et al. (2021) | Mostly inductive | ‘[S]ocial movement theory’ (e.g. Futrell and Simi 2004) and ‘social constructionist paradigm’ (Snow 2001) | Web scraping | 1,000 ‘highly upvoted user-submitted comments, and 1,000 random user-submitted comments’ |
| Jones et al. (2020) | Deductive | Toxic masculinity (Haider 2016) and ‘hegemonic masculinity’ (Connell and Messerschmidt 2005) | Web scraping | 1,550 tweets from 3 very active ‘users on Twitter’, 138 responding tweets, and a specific website (extensive discussion of intercoder reliability) |
| Lupinacci (2021) | Inductive; referring to prior empirical work | / | Interviews  (diary interviews) | 5-day diary interviews of 20 participants living in London; explicitly not representative |
| Timmermans et al. (2021) | Inductive; referring to prior empirical work | / | Survey; open and closed questions | 328 mobile daters |

(1) The table covers all top-20 most cited papers and all top-20 papers by citations per year

(2) Moving beyond simple notions of influencers ‘gaming the system’ to ‘playing the visibility game’, where the latter allows for greater agency of other parties than the influencers and their opportunistic responses to known algorithmic processes
